# Machine learning is more accurate and biased than risk scoring tools in the prediction of postoperative atrial fibrillation after cardiac surgery

Joyce C Ho <sup>\*1</sup>, Shalmali Joshi <sup>†2</sup>, Eduardo Valverde <sup>‡3</sup>, Kathryn Wood <sup>§4</sup>, Kendra Grubb <sup>¶5</sup>, Miguel Leal <sup>ⓧ5</sup>, and Vicki Stover Hertzberg <sup>\*\*4</sup>

<sup>1</sup>Department of Computer Science, Emory University

<sup>2</sup>Department of Biomedical Informatics, Columbia University

<sup>3</sup>Department of Computer Science, Georgia Institute of Technology

<sup>4</sup>School of Nursing, Emory University

<sup>5</sup>School of Medicine, Emory University

## Abstract

Incidence of postoperative atrial fibrillation (POAF) after cardiac surgery remains high and is associated with adverse patient outcomes. Risk scoring tools have been developed to predict POAF, yet discrimination performance remains moderate. Machine learning (ML) models can achieve better performance but may exhibit performance heterogeneity across race and sex subpopulations. We evaluate 8 risk scoring tools and 6 ML models on a heterogeneous cohort derived from electronic health records. Our results suggest that ML models achieve higher discrimination yet are less fair, especially with respect to race. Our findings highlight the need for building accurate and fair ML models to facilitate consistent and equitable assessment of POAF risk.

**Keywords:** POAF, ML, Fairness

---

\*joyce.c.ho@emory.edu

†sj3261@cumc.columbia.edu

‡evalverde3@gatech.edu

§kathryn.wood@emory.edu

¶kendra.janel.grubb@emory.edu

ⓧmiguel.a.leal@emory.edu

\*\*vhertz@emory.edu

## 22 **1 Introduction**

23 Although there have been advancements in cardiac surgery techniques, the incidence of postop-  
24 erative atrial fibrillation (POAF) following cardiac surgery has not decreased significantly and still  
25 ranges from 15% to 50% [1, 2]. Unfortunately, there are short- and long-term adverse outcomes  
26 associated with POAF including morbidity, mortality, and longer, more expensive hospitalizations  
27 [3, 4, 5, 6, 7]. Early identification of patients at risk for developing POAF has long been desired  
28 to guide preventative and treatment strategies. To this end, more than a dozen POAF risk scoring  
29 algorithms have been introduced encompassing a variety of risk factors including patient demo-  
30 graphics and clinical characteristics as well as surgical characteristics. Yet a recent review found  
31 only patient age had no conflicting evidence across existing studies [8]. Moreover, these scoring  
32 systems offer moderate discrimination with area under the receiver operating characteristic curve  
33 (AUROC) scores ranging between 0.55 and 0.87 and may not generalize broadly as the performance  
34 is assessed on relatively small, homogeneous patient populations.

35 Machine learning (ML) has been proposed as an alternative to achieve better predictive perfor-  
36 mance [9]. A recent scoping review found that support vector machines (SVM), gradient boosting  
37 machines (GBM), and random forests (RF) using clinical characteristics can predict POAF risk more  
38 accurately than existing risk scores with promising specificity, sensitivity, and AUROC scores [9].  
39 Three existing works compared multiple ML algorithms with Lu et al [10] and Parise et al. [11]  
40 concluding that SVM achieved the best performance while GBM performed the best in Karri et al.  
41 [12]. Despite their promise, indiscriminate application of ML models can exacerbate existing health  
42 disparities if they are not trained on a representative sample [13].

43 Unfortunately, significant race and sex disparities exist as the number of patients undergoing car-  
44 diac surgery procedures and the outcomes for these patients [14]. Incidence of POAF after coro-  
45 nary artery bypass graft (CABG) surgery is higher in White patients [15]. It has also been suggested  
46 males are more likely to experience POAF following CABG [16, 17] although there exists conflicting  
47 evidence [18]. However, only 2 studies utilizing ML report the ethnicity composition of the under-  
48 lying dataset and both studies assessed the performance in populations with less than 4% Black  
49 patients [12, 19]. Thus, a crucial unanswered question is whether the better performance of ML

50 algorithms may exacerbate existing disparities.

51 The objective of this study is to assess both the predictive performance and fairness of existing  
52 POAF risk scoring tools with popular ML algorithms on a heterogeneous population, with more  
53 than 20% of the patients identifying as Black. We assess the fairness of the predictive models in  
54 both race and sex subpopulations. We also restrict our evaluation to common structured data found  
55 within electronic health records (EHRs) as such algorithms can provide quicker (and hopefully more  
56 accurate) management strategies [9].

## 57 **2 Methods**

### 58 **2.1 Data Source**

59 Our study was conducted using de-identified EHRs from the Emory Healthcare clinical data ware-  
60 house. Secondary data analysis was approved by the Emory University Institutional Review Board.  
61 Adult patients who received cardiac surgery in the outpatient or inpatient setting between Jan-  
62 uary 1, 2013 and December 31, 2017 were included. Cardiac surgery was defined using the Current  
63 Procedural Terminology (CPT) codes as either venous grafting for CABG or surgical procedures on  
64 cardiac valves (see Supplemental Material for full list). For security purposes, patient identifiers  
65 were omitted and certain records were excluded based on the date shifting logic. Patients who  
66 had a prior history of atrial fibrillation (AF), defined by the International Classification of Diseases  
67 codes of '427.31' for the 9th revision (ICD-9) or 'I48.XX' for the 10th revision (ICD-10) were ex-  
68 cluded from the study. We used the presence of the AF ICD-9 or ICD-10 code following the cardiac  
69 surgery procedure date to identify cases of POAF. The value of 0 was assigned to patients that did  
70 not experience POAF and had at least 1 encounter after the cardiac surgery.

71 All the clinical variables including age, sex, race, height, weight, and blood pressure were extracted  
72 from the EHR. We used the most recent value collected within the 1 year prior to the cardiac surgery  
73 date. The presence of clinical comorbidities for the risk scoring systems was determined using di-  
74 agnostic (ICD-9 or ICD-10), procedural (CPT), and medication codes. For the ML clinical variables,  
75 we grouped the diagnostic codes using the single-level Clinical Classifications Software (CCS) sys-  
76 tem and medication codes using Anatomical Therapeutic Chemical (ATC) Level 3 classification

77 codes.

## 78 **2.2 Risk Scores**

79 We evaluated POAF risk scoring systems and incident AF risk scoring systems that utilize com-  
80 monly collected measures in structured EHR data. Although a recent review identified at least  
81 12 distinct POAF scoring systems, [8] several used echocardiographic measurements such as left  
82 atrial dilation, left atrial diameter, and left ventricular ejection fraction which are often captured  
83 in unstructured text and are not easily accessible broadly. As such, we focused on the following 8  
84 risk scores: (1) CHADS<sub>2</sub>, [20] (2) CHA<sub>2</sub>DS<sub>2</sub>-VASc, [20] (3) HATCH, [21] (4) COM-AF, [22] (5) C<sub>2</sub>HEST,  
85 [23] (6) mC<sub>2</sub>HEST, [24] (7) AFRI [25], and (8) CHARGE-AF [26]. The Python code for the scor-  
86 ing systems is openly available as a GitHub repository (<https://github.com/joyceho/afib>). The  
87 predictor variables for each model can be found in Supplemental Table 3.

## 88 **2.3 Machine Learning Models**

89 Six commonly used ML algorithms were explored that have been previously benchmarked from  
90 previous existing studies: (1) logistic regression (LR), (2) decision tree (DT), (3) SVM, (4) RF, (5) GBM,  
91 and (6) multi-layer perceptron (MLP). The ML models were constructed using the popular Python  
92 open-source software library, `scikit-learn` version 1.5.0 [27]. The ML models were supplied with  
93 age, race, gender, CCS, and ATC codes. CCS and ATC codes that were not present in at least  
94 20% of the patients were excluded. A total of 71 variables were supplied as input to the models.  
95 Exhaustive hyperparameter optimization was performed using 5-fold cross validation on the training  
96 dataset (see Supplemental Table 5 for the parameter search space for each model). The optimal  
97 hyperparameter for each model was identified using AUROC.

## 98 **2.4 Training and Evaluation**

99 We used stratified Monte Carlo cross validation to randomly split the data into 70-30% train-test.  
100 This process was repeated 10 times to assess model performance. Data imputation was required  
101 for age, height, weight, and blood pressure. Mean imputation from the training data was used.  
102 Predictive performance was measured using AUROC and area under the precision recall curve

103 (AUPRC) on the test set. AUROC and AUPRC were calculated using the `scikit-learn` package on  
104 the test data. We also assessed the fairness of the models on the sex (female and male) and race  
105 (White and Black/Other) subgroups. Two popular group fairness metrics were used, demographic  
106 parity ratio (DPR) and equalized odds ratio (EQR). DPR measures whether the predictive proportion  
107 of POAF across the subgroups are equal (i.e., the prediction risk should be independent of sex or  
108 race). EQR ensures the true positive rate and false positive rate of predictions are the same across  
109 the subgroups. Both DPR and EQR range from 0 to 1 with 1 indicates fairness across the subgroups.  
110 DPR and EQR were computed using the `fairlearn` package version 0.10.0.[28] All analyses were  
111 performed using Python version 3.9.7.

## 112 **3 Results**

### 113 **3.1 Patient Characteristics**

114 Out of the final study population of 4961 patients, 1953 (39.4%) experienced POAF following cardiac  
115 surgery with an average onset of xxx. Baseline characteristics of the overall study population and the  
116 2 outcome groups (no POAF and POAF) are reported in Table 1. The incidence of POAF experienced  
117 in males (40.1%) and Whites (42.5%) was statistically higher than in females (37.9%) and Blacks  
118 (32.3%), respectively.

### 119 **3.2 Performance Comparison**

120 Table 2 summarizes the discrimination and fairness performance of the 14 models (8 risk scoring  
121 algorithms and 6 ML models). For each performance metric, the value represents the mean across  
122 the 10 test splits. Statistical significance in discrimination performance between any 2 models  
123 was assessed using a one-tailed paired t-test that the difference is greater than 0 (i.e., one model  
124 consistently outperforms the other).

125 The ML model that achieved the best discrimination was RF with AUROC and AUPRC of 0.671 and  
126 0.558, respectively. Only GBM yielded a p-value above 0.001 for AUROC (0.03) and AUPRC (0.06)  
127 during the one-tailed paired t-test between RF and the other 5 ML models. Among the risk scoring  
128 systems, CHARGE-AF achieved the best performance with AUROC and AUPRC of 0.585 and 0.449,

Table 1: Baseline characteristics in patients with and without POAF.

|                         | Missing | Overall<br>(n=4961) | No POAF<br>(n=3008) | POAF<br>(n=1953) | P-Value |
|-------------------------|---------|---------------------|---------------------|------------------|---------|
| Age, mean (SD)          | 19      | 64.6 (12.4)         | 63.3 (13.1)         | 66.5 (10.9)      | <0.001  |
| Male, n (%)             | 0       | 3300 (66.5)         | 1976 (65.7)         | 1324 (67.8)      | 0.133   |
| Ethnicity, n (%)        | 0       |                     |                     |                  | <0.001  |
| White                   |         | 3426 (69.1)         | 1970 (65.5)         | 1456 (74.6)      |         |
| Black                   |         | 1085 (21.9)         | 735 (24.4)          | 350 (17.9)       |         |
| Other                   |         | 450 (9.1)           | 303 (10.1)          | 147 (7.5)        |         |
| CHF, n (%)              | 0       | 2066 (41.6)         | 1226 (40.8)         | 840 (43.0)       | 0.123   |
| HTN, n (%)              | 0       | 2999 (60.5)         | 1888 (62.8)         | 1111 (56.9)      | <0.001  |
| DM, n (%)               | 0       | 1382 (27.9)         | 864 (28.7)          | 518 (26.5)       | 0.098   |
| Stroke, n (%)           | 0       | 959 (19.3)          | 560 (18.6)          | 399 (20.4)       | 0.123   |
| Vascular Disease, n (%) | 0       | 2004 (40.4)         | 1253 (41.7)         | 751 (38.5)       | 0.027   |
| COPD, n (%)             | 0       | 509 (10.3)          | 307 (10.2)          | 202 (10.3)       | 0.914   |
| CAD, n (%)              | 0       | 4041 (81.5)         | 2503 (83.2)         | 1538 (78.8)      | <0.001  |
| SHF, n (%)              | 0       | 379 (7.6)           | 228 (7.6)           | 151 (7.7)        | 0.887   |
| Hyperthyroid, n (%)     | 0       | 18 (0.4)            | 14 (0.5)            | 4 (0.2)          | 0.211   |
| Valvular, n (%)         | 0       | 3099 (62.5)         | 1783 (59.3)         | 1316 (67.4)      | <0.001  |
| PVD, n (%)              | 0       | 1265 (25.5)         | 723 (24.0)          | 542 (27.8)       | 0.004   |
| Obesity, n (%)          | 0       | 420 (8.5)           | 255 (8.5)           | 165 (8.4)        | 1.000   |
| Height (m), mean (SD)   | 65      | 67.7 (4.6)          | 67.4 (4.6)          | 68.0 (4.5)       | <0.001  |
| Weight (kg) , mean (SD) | 41      | 192.0 (45.8)        | 189.9 (44.5)        | 195.3 (47.5)     | <0.001  |
| SBP, mean (SD)          | 40      | 135.3 (22.3)        | 135.1 (22.2)        | 135.5 (22.4)     | 0.559   |
| DBP, mean (SD)          | 41      | 74.4 (12.9)         | 74.8 (12.9)         | 73.8 (12.8)      | 0.015   |

Table 2: Average discrimination and fairness performance of the prediction models across 10 Monte Carlo cross-validation splits.

| Model                                  | AUROC | AUPRC | Race  |       | Sex   |       |
|----------------------------------------|-------|-------|-------|-------|-------|-------|
|                                        |       |       | DPR   | EQR   | DPR   | EQR   |
| RF                                     | 0.671 | 0.558 | 0.824 | 0.816 | 0.967 | 0.946 |
| GBM                                    | 0.666 | 0.553 | 0.837 | 0.835 | 0.975 | 0.948 |
| SVM                                    | 0.658 | 0.540 | 0.828 | 0.827 | 0.976 | 0.958 |
| LR                                     | 0.645 | 0.521 | 0.659 | 0.618 | 0.949 | 0.903 |
| DT                                     | 0.630 | 0.534 | 0.970 | 0.950 | 0.962 | 0.942 |
| MLP                                    | 0.622 | 0.494 | 0.789 | 0.772 | 0.953 | 0.923 |
| CHARGE-AF                              | 0.578 | 0.443 | 0.896 | 0.895 | 0.941 | 0.926 |
| AFRI                                   | 0.568 | 0.474 | 1.000 | 1.000 | 1.000 | 1.000 |
| COM-AF                                 | 0.550 | 0.416 | 0.993 | 0.980 | 0.884 | 0.858 |
| HAVOC                                  | 0.527 | 0.401 | 0.999 | 0.999 | 0.999 | 0.998 |
| HATCH                                  | 0.527 | 0.400 | 1.000 | 1.000 | 1.000 | 1.000 |
| mC <sub>2</sub> HEST                   | 0.526 | 0.408 | 1.000 | 1.000 | 1.000 | 1.000 |
| CHA <sub>2</sub> DS <sub>2</sub> -VASc | 0.525 | 0.408 | 1.000 | 1.000 | 1.000 | 1.000 |
| CHADS <sub>2</sub>                     | 0.517 | 0.401 | 1.000 | 1.000 | 1.000 | 1.000 |
| C <sub>2</sub> HEST                    | 0.509 | 0.401 | 1.000 | 1.000 | 1.000 | 1.000 |

129 respectively. Notably, all 6 ML models outperformed CHARGE-AF and the other risk scoring tools  
130 at statistically significant levels ( $p\text{-value} < 0.001$ ) for both discrimination metrics.

131 The risk scoring systems generally yielded the best group fairness concerning race as all but  
132 CHARGE-AF, COM-AF, and HAVOC resulted in both DPR and EQR of 1. Notably, CHARGE-AF is the  
133 only risk scoring system incorporating race as a variable (see Supplemental Table 3), yet achieves  
134 the worst group fairness. In contrast, all the ML models except DT perform worse in terms of DPR  
135 and EQR to CHARGE-AF (DPR = 0.896 and EQR = 0.895).

136 A similar group fairness trend is observed for sex in terms of risk scoring systems again as CHARGE-  
137 AF, COM-AF, and HAVOC do not yield DPR and EQR of 1. However, the ML models achieve slightly  
138 better performance than CHARGE-AF and COM-AF in terms of DPR and EQR for race. Surprisingly,  
139 COM-AF which incorporates sex as a variable yields the worst DPR and EQR performance with  
140 values of 0.884 and 0.858, respectively.

## 141 **4 Discussion**

142 In this study, we evaluated the performance of 6 ML models and 8 risk scoring algorithms to predict  
143 POAF. We demonstrated that RF outperformed the other ML methods and all of the risk scores  
144 considered in terms of AUROC and AUPRC. Furthermore, there were statistical differences between  
145 the discrimination performance of RF and the other models except for the GBM algorithm. The  
146 AUROC and AUPRC of these 14 models were all under 0.671 and 0.558 respectively. Compared  
147 to the existing ML studies, the discrimination performance is lower as they achieved an AUROC  
148 of at least 0.72. However, these models used indicators related to cardiac surgery which are not  
149 commonly available in the structured EHR data.

150 In contrast to the discrimination performance, six of the risk scores outperformed all of the ML  
151 methods and three of the risk scores with respect to metrics of fairness. In fact, the results indicate  
152 the ML models exacerbated race and sex differentials when used for POAF prediction, which is  
153 consistent with existing evidence for other outcomes such as cardiovascular risk [29], dermatology  
154 [30], and population health [31]. Thus, better discrimination performance may not always be desired  
155 as it might exacerbate existing race and sex disparities. This suggests further investigation is

156 necessary to holistically assess the efficacy of ML algorithms for POAF prognostication in real  
157 clinical contexts, [32] and whether bias mitigation mechanisms should be adopted to minimize  
158 disparities in outcomes and interventions.

## 159 **Abbreviations**

160 **POAF**: post-operative atrial fibrillation; **AUROC**: area under the receiver operating characteristic  
161 curve; **ML**: machine learning; **SVM**: support vector machines; **GBM**: gradient boosting machines;  
162 **RF**: random forests; **CABG**: coronary artery bypass graft



## 163 5 Supplemental Information

### 164 5.1 Risk scoring algorithms

165 The variables used for each of the 8 risk scores are summarized in Table 3. While other risk scoring  
 166 systems have been developed using POAF as an event of interest[8], they are not benchmarked in  
 167 our study as they use variables such as left atrial dilatation, left atrial diameter, left ventricular ejec-  
 168 tion fraction, and length of stenosis. The scores in Table 3 can be computed from demographic  
 169 information, diagnosis tables (ICD-9/ICD-10), vital signs commonly collected, and medication ta-  
 170 bles.

Table 3: Risk scoring systems, the original event of interests, and their associated variables. The events of interest are thromboembolic events in patients with atrial fibrillation (VTE), incident AF (AF), and POAF.

| Score                                       | Event | Age | Gender | Race | CHF | HTN | DM | Stroke | Vascular | COPD | CAD | SHF | Hyperthyroid | PVD | MI | Height | Weight | SBP | DBP | Smoking | HTN Meds |
|---------------------------------------------|-------|-----|--------|------|-----|-----|----|--------|----------|------|-----|-----|--------------|-----|----|--------|--------|-----|-----|---------|----------|
| CHADS <sub>2</sub> [20]                     | VTE   | x   |        |      | x   | x   | x  | x      |          |      |     |     |              |     |    |        |        |     |     |         |          |
| CHA <sub>2</sub> DS <sub>2</sub> -VASc [20] | VTE   | x   | x      |      | x   | x   | x  | x      | x        |      |     |     |              |     |    |        |        |     |     |         |          |
| HATCH [21]                                  | AF    | x   |        |      | x   | x   |    |        |          | x    |     |     |              |     |    |        |        |     |     |         |          |
| COM-AF [22]                                 | POAF  | x   | x      |      | x   | x   | x  | x      |          |      |     |     |              |     |    |        |        |     |     |         |          |
| C <sub>2</sub> HEST [23]                    | AF    | x   |        |      |     | x   |    |        |          | x    | x   | x   | x            |     |    |        |        |     |     |         |          |
| mC <sub>2</sub> HEST [24]                   | AF    | x   |        |      |     | x   |    |        |          | x    | x   | x   | x            |     |    |        |        |     |     |         |          |
| AFRI [25]                                   | POAF  | x   |        |      |     |     |    |        |          |      |     |     |              | x   |    | x      | x      |     |     |         |          |
| CHARGE-AF [26]                              | AF    | x   |        | x    | x   | x   | x  |        |          |      |     |     |              |     | x  | x      | x      | x   | x   | x       | x        |

### 171 5.2 ML for POAF

172 A recent scoping review identified 7 papers that used ML for predicting POAF after cardiac surgery.[9]  
 173 Of the 7 studies, 3 relied on electrocardiogram data while the remaining 4 used clinical documenta-  
 174 tion, administrative data, or Holter monitoring. The sample size, ethnicity composition, and model  
 175 performance of the 4 ML studies using administrative data are summarized in Table 4. As can be  
 176 seen, none of the patient populations contains more than 3.4% Black.

177 Table 5 summarizes the hyperparameter search space for each of the ML models. For each train-  
 178 test split and ML model, GridSearchCV in scikit-learn was performed using 5-folds on the train

Table 4: Previous ML studies for POAF prediction.

| Authors            | Dataset                                                              | n     | White-Black (%) | Best ML (AUROC) |
|--------------------|----------------------------------------------------------------------|-------|-----------------|-----------------|
| Magee et al. [19]  | Cardiopulmonary Research Science and Technology Institute            | 19620 | 90.7-3.2        | LR (0.72)       |
| Karri et al. [12]  | MIMIC-III                                                            | 6040  | 74.0-3.4        | GBM (0.74)      |
| Lu et al. [10]     | Second Affiliated Hospital of Zhejiang University School of Medicine | 1400  | Unknown         | SVM (0.78)      |
| Parise et al. [11] | Maastricht University Medical Center+                                | 394   | Unknown         | SVM (0.95)      |

Table 5: Hyperparameter search space for the different ML models.

| Model | Parameter Space                                                                                                         |
|-------|-------------------------------------------------------------------------------------------------------------------------|
| LR    | C: [0.001, 0.01, 0.1, 1]                                                                                                |
| DT    | Criterion: [gini, entropy]<br>Max depth: [3, 4, 5, 6, 7, 8]                                                             |
| RF    | Max depth: [10, 15, 20]<br>Min leaf samples: [5, 10]<br>Num estimators: [50, 100, 200, 300]                             |
| GBM   | Max depth: [5, 8, 10]<br>Learning rate: [0.1, 0.01]<br>Min leaf samples: [5, 10]<br>Num estimators: [50, 100, 150, 200] |
| SVM   | C: [0.1, 1, 10, 100]<br>Kernel: [linear, rbf]                                                                           |
| MLP   | Hidden layers: [(15, 10), (15,), (25, ), (50,), (25, 25, )]                                                             |

179 split to find the optimal hyperparameter values. The ML model is then retrained using the optimal  
 180 hyperparameter values and the performance is evaluated on the test set.

## 181 **References**

- 182 [1] Giovanni Filardo, Ralph J Damiano, Gorav Ailawadi, Vinod H Thourani, Benjamin D Pollock,  
183 Danielle M Sass, Teresa K Phan, Hoa Nguyen, and Briget Da Graca. Epidemiology of new-  
184 onset atrial fibrillation following coronary artery bypass graft surgery. *Heart*, 104(12):985–992,  
185 2018.
- 186 [2] Orlando R Suero, Ahmed K Ali, Lauren R Barron, Matthew W Segar, Marc R Moon, and Subhasis  
187 Chatterjee. Postoperative atrial fibrillation (poaf) after cardiac surgery: clinical practice review.  
188 *Journal of Thoracic Disease*, 16(2), 2024.
- 189 [3] Rachel Eikelboom, Rohan Sanjanwala, Me-Linh Le, Michael H Yamashita, and Rakesh C Arora.  
190 Postoperative atrial fibrillation after cardiac surgery: a systematic review and meta-analysis.  
191 *The Annals of Thoracic Surgery*, 111(2):544–554, 2021.
- 192 [4] Ben O’Brien, Peter S. Burrage, Jennie Yee Ngai, Jordan M. Prutkin, Chuan-Chin Huang, Xinling  
193 Xu, Sanders H. Chae, Bruce A. Bollen, Jonathan P. Piccini, Nanette M. Schwann, Aman Mahajan,  
194 Marc Ruel, Simon C. Body, Frank W. Sellke, Joseph Mathew, and J. Daniel Muehlschlegel. Soci-  
195 ety of cardiovascular anesthesiologists/european association of cardiothoracic anaesthetists  
196 practice advisory for the management of perioperative atrial fibrillation in patients undergoing  
197 cardiac surgery. *Journal of Cardiothoracic and Vascular Anesthesia*, 33(1):12–26, 2019.
- 198 [5] Ahmed AlTurki, Mariam Marafi, Riccardo Proietti, Daniela Cardinale, Robert Blackwell, Paul  
199 Dorian, Amal Bessissow, Lucy Vieira, Isabelle Greiss, Vidal Essebag, Jeff S. Healey, and Thao  
200 Huynh. Major adverse cardiovascular events associated with postoperative atrial fibrillation  
201 after noncardiac surgery: a systematic review and meta-analysis. *Circulation: Arrhythmia and*  
202 *Electrophysiology*, 13(1):e007437, 2020.
- 203 [6] Peter S Burrage, Ying H Low, Niall G Campbell, and Ben O’Brien. New-onset atrial fibrillation  
204 in adult patients after cardiac surgery. *Current anesthesiology reports*, 9:174–193, 2019.
- 205 [7] Michael K. Wang, Pascal B. Meyre, Rachel Heo, P.J. Devereaux, Lauren Birchenough, Richard  
206 Whitlock, William F. McIntyre, Yu Chiao Peter Chen, Muhammad Zain Ali, Fausto Biancari,  
207 Jawad Haider Butt, Jeff S. Healey, Emilie P. Belley-Côté, Andre Lamy, and David Conen. Short-

- 208 term and long-term risk of stroke in patients with perioperative atrial fibrillation after cardiac  
209 surgery: systematic review and meta-analysis. *CJC open*, 4(1):85–96, 2022.
- 210 [8] Hugh Fleet, David Pilcher, Rinaldo Bellomo, and Tim G Coulson. Predicting atrial fibrillation  
211 after cardiac surgery: a scoping review of associated factors and systematic review of existing  
212 prediction models. *Perfusion*, 38(1):92–108, 2023.
- 213 [9] Adham H El-Sherbini, Aryan Shah, Richard Cheng, Abdelrahman Elsebaie, Ahmed A Harby,  
214 Damian Redfearn, and Mohammad El-Diasty. Machine learning for predicting postoperative  
215 atrial fibrillation after cardiac surgery: A scoping review of current literature. *The American  
216 Journal of Cardiology*, 209:66–75, 2023.
- 217 [10] Yufan Lu, Qingjuan Chen, Hu Zhang, Meijiao Huang, Yu Yao, Yue Ming, Min Yan, Yunxian Yu, and  
218 Lina Yu. Machine learning models of postoperative atrial fibrillation prediction after cardiac  
219 surgery. *Journal of Cardiothoracic and Vascular Anesthesia*, 37(3):360–366, 2023.
- 220 [11] Orlando Parise, Gianmarco Parise, Akshayaa Vaidyanathan, Mariaelena Occhipinti, Ali Ghar-  
221 aviri, Cecilia Tetta, Elham Bidar, Bart Maesen, Jos G. Maessen, Mark La Meir, and Sandro  
222 Gelsomino. Machine learning to identify patients at risk of developing new-onset atrial fib-  
223 rillation after coronary artery bypass. *Journal of Cardiovascular Development and Disease*,  
224 10(2):82, 2023.
- 225 [12] Roshan Karri, Andrew Kawai, Yoke Jia Thong, Dhruvesh M Ramson, Luke A Perry, Reny Segal,  
226 Julian A Smith, and Jahan C Penny-Dimri. Machine learning outperforms existing clinical  
227 scoring tools in the prediction of postoperative atrial fibrillation during intensive care unit  
228 admission after cardiac surgery. *Heart, Lung and Circulation*, 30(12):1929–1937, 2021.
- 229 [13] Irene Y Chen, Emma Pierson, Sherri Rose, Shalmali Joshi, Kadija Ferryman, and Marzyeh Ghas-  
230 semi. Ethical machine learning in healthcare. *Annual review of biomedical data science*,  
231 4:123–144, 2021.
- 232 [14] Mohamad Alkhoul, Fahad Alqahtani, David R Holmes, and Chalak Berzingi. Racial disparities  
233 in the utilization and outcomes of structural heart disease interventions in the united states.  
234 *Journal of the American Heart Association*, 8(15):e012125, 2019.

- 235 [15] David W Yaffee, Raymond G McKay, Jeffrey Mather, Scott Vella Sorensen, Andrew Kehm, Sean  
236 McMahon, Trevor Sutton, and Sabet W Hashim. Racial disparities in atrial fibrillation after  
237 coronary artery bypass: Impact of left atrial volume. *Annals of Thoracic Surgery Short Reports*,  
238 1(4):631–634, 2023.
- 239 [16] Mariana Fragão-Marques, Jennifer Mancio, João Oliveira, Inês Falcão-Pires, and Adelino  
240 Leite-Moreira. Gender differences in predictors and long-term mortality of new-onset postop-  
241 erative atrial fibrillation following isolated aortic valve replacement surgery. *Annals of Thoracic  
242 and Cardiovascular Surgery*, 26(6):342–351, 2020.
- 243 [17] Giovanni Filardo, Gorav Ailawadi, Benjamin D Pollock, Briget da Graca, Teresa K Phan, Vinod  
244 Thourani, and Ralph J Damiano Jr. Postoperative atrial fibrillation: sex-specific characteristics  
245 and effect on survival. *The Journal of thoracic and cardiovascular surgery*, 159(4):1419–1425,  
246 2020.
- 247 [18] Giovanni Filardo, Gorav Ailawadi, Benjamin D Pollock, Briget Da Graca, Danielle M Sass,  
248 Teresa K Phan, Debbie E Montenegro, Vinod Thourani, and Ralph Damiano. Sex differences in  
249 the epidemiology of new-onset in-hospital post-coronary artery bypass graft surgery atrial  
250 fibrillation: a large multicenter study. *Circulation: Cardiovascular Quality and Outcomes*,  
251 9(6):723–730, 2016.
- 252 [19] Mitchell J Magee, Morley A Herbert, Todd M Dewey, James R Edgerton, William H Ryan, Syma  
253 Prince, and Michael J Mack. Atrial fibrillation after coronary artery bypass grafting surgery:  
254 development of a predictive risk algorithm. *The Annals of thoracic surgery*, 83(5):1707–1712,  
255 2007.
- 256 [20] Gregory YH Lip, Robby Nieuwlaat, Ron Pisters, Deirdre A Lane, and Harry JGM Crijns. Refin-  
257 ing clinical risk stratification for predicting stroke and thromboembolism in atrial fibrillation  
258 using a novel risk factor-based approach: the Euro Heart Survey on atrial fibrillation. *Chest*,  
259 137(2):263–272, 2010.
- 260 [21] Cees B De Vos, Ron Pisters, Robby Nieuwlaat, Martin H Prins, Robert G Tieleman, Robert-Jan S  
261 Coelen, Antonius C van den Heijkant, Maurits A Allessie, and Harry JGM Crijns. Progression

- 262 from paroxysmal to persistent atrial fibrillation: clinical correlates and prognosis. *Journal of*  
263 *the American College of Cardiology*, 55(8):725–731, 2010.
- 264 [22] Lucrecia M Burgos, Andreína Gil Ramírez, Leonardo Seoane, Juan F Furmento, Juan P Costa-  
265 bel, Mirta Diez, and Daniel Navia. New combined risk score to predict atrial fibrillation after  
266 cardiac surgery: Com-af. *Annals of cardiac anaesthesia*, 24(4):458–463, 2021.
- 267 [23] Yan-Guang Li, Daniele Pastori, Alessio Farcomeni, Pil-Sung Yang, Eunsun Jang, Boyoung  
268 Joung, Yu-Tang Wang, Yu-Tao Guo, and Gregory YH Lip. A simple clinical risk score (c2hest) for  
269 predicting incident atrial fibrillation in asian subjects: derivation in 471,446 chinese subjects,  
270 with internal validation and external application in 451,199 korean subjects. *Chest*, 155(3):510–  
271 518, 2019.
- 272 [24] Yan-Guang Li, Jin Bai, Gongbu Zhou, Juan Li, Yi Wei, Lijie Sun, Lingyun Zu, and Shuwang  
273 Liu. Refining age stratum of the c2hest score for predicting incident atrial fibrillation in a  
274 hospital-based chinese population. *European journal of internal medicine*, 90:37–42, 2021.
- 275 [25] Mikhael F El-Chami, Patrik D Kilgo, K Miriam Elfstrom, Michael Halkos, Vinod Thourani, Omar M  
276 Lattouf, David B Delurgio, Robert A Guyton, Angel R Leon, and John D Puskas. Prediction of  
277 new onset atrial fibrillation after cardiac revascularization surgery. *The American journal of*  
278 *cardiology*, 110(5):649–654, 2012.
- 279 [26] Alvaro Alonso, Bouwe P Krijthe, Thor Aspelund, Katherine A Stepsas, Michael J Pencina, Car-  
280 lee B Moser, Moritz F Sinner, Nona Sotoodehnia, João D Fontes, A Cecile JW Janssens,  
281 Richard A Kronmal, Jared W Magnani, Jacqueline C Witteman, Alanna M Chamberlain,  
282 Steven A Lubitz, Renate B Schnabel, Sunil K Agarwal, David D McManus, Patrick T Ellinor,  
283 Martin G Larson, Gregory L Burke, Lenore J Launer, Albert Hofman, Daniel Levy, John S Gott-  
284 diener, Stefan Kääh, David Couper, Tamara B Harris, Elsayed Z Soliman, Bruno H C Stricker,  
285 Vilmundur Gudnason, Susan R Heckbert, and Emelia J Benjamin. Simple risk model predicts  
286 incidence of atrial fibrillation in a racially and geographically diverse population: the charge-af  
287 consortium. *Journal of the American Heart Association*, 2(2):e000102, 2013.
- 288 [27] Fabian Pedregosa, Gaël Varoquaux, Alexandre Gramfort, Vincent Michel, Bertrand Thirion,  
289 Olivier Grisel, Mathieu Blondel, Peter Prettenhofer, Ron Weiss, Vincent Dubourg, Jake Vander-

290 plas, Alexandre Passos, David Cournapeau, Matthieu Brucher, Matthieu Perrot, and Édouard  
291 Duchesnay. Scikit-learn: Machine learning in Python. *Journal of Machine Learning Research*,  
292 12:2825–2830, 2011.

293 [28] Hilde Weerts, Miroslav Dudík, Richard Edgar, Adrin Jalali, Roman Lutz, and Michael Madaio.  
294 Fairlearn: Assessing and improving fairness of ai systems. *Journal of Machine Learning Re-*  
295 *search*, 24(257):1–8, 2023.

296 [29] Uri Kartoun, Shaan Khurshid, Bum Chul Kwon, Aniruddh P Patel, Puneet Batra, Anthony Philip-  
297 pakis, Amit V Khera, Patrick T Ellinor, Steven A Lubitz, and Kenney Ng. Prediction performance  
298 and fairness heterogeneity in cardiovascular risk models. *Scientific Reports*, 12(1):12542, 2022.

299 [30] Adewole S Adamson and Avery Smith. Machine learning and health care disparities in der-  
300 matology. *JAMA dermatology*, 154(11):1247–1248, 2018.

301 [31] Ziad Obermeyer, Brian Powers, Christine Vogeli, and Sendhil Mullainathan. Dissecting racial  
302 bias in an algorithm used to manage the health of populations. *Science*, 366(6464):447–453,  
303 2019.

304 [32] Melissa Mccradden, Oluwadara Odusi, Shalmali Joshi, Ismail Akrouf, Kagiso Ndlovu, Ben  
305 Glocker, Gabriel Maicas, Xiaoxuan Liu, Mjaye Mazwi, Tee Garnett, Lauren Oakden-Rayner, Myrt-  
306 ede Alfred, Irvine Sihlahla, Oswa Shafei, and Anna Goldenberg. What’s fair is... fair? presenting  
307 justefab, an ethical framework for operationalizing medical ethics and social justice in the in-  
308 tegration of clinical machine learning: Justefab. In *Proceedings of the 2023 ACM Conference*  
309 *on Fairness, Accountability, and Transparency*, pages 1505–1519, 2023.
